# Supplementary material for: Addressing sociodemographic disparities in COVID-19 vaccine uptake among youth in Zimbabwe
Source: HighWire-hosted journal article supplement (doi:10.1136/bmjgh-2023-012268), 2023-07-01
Supplement: bmjgh-2023-012268supp001_data_supplement.pdf [file bmjgh-2023-012268supp001_data_supplement.pdf]

**Supplemental Table 1:** Reason for not getting vaccinated stratified by socioeconomic quintile

|                                                                                             | Poorest 20%<br>(n=1897) | 2nd quintile<br>(n=1341) | 3rd quintile<br>(n=1399) | 4th quintile<br>(n=1322) | Least poor 20%<br>(n=1062) |
|---------------------------------------------------------------------------------------------|-------------------------|--------------------------|--------------------------|--------------------------|----------------------------|
| I didn't know that there was a vaccine against COVID-19                                     | 15 (0.8%)               | 9 (0.7%)                 | 12 (0.9%)                | 11 (0.8%)                | 5 (0.5%)                   |
| I think I'm not eligible for the COVID-19 vaccine                                           | 136 (7.2%)              | 111 (8.3%)               | 127 (9.1%)               | 106 (8.0%)               | 70 (6.6%)                  |
| I didn't know where I can get the COVID-19 vaccine                                          | 22 (1.2%)               | 24 (1.8%)                | 27 (1.9%)                | 25 (1.9%)                | 21 (2.0%)                  |
| I do not have money for transport to get to the vaccination centre                          | 17 (0.9%)               | 22 (1.6%)                | 17 (1.2%)                | 16 (1.2%)                | 7 (0.7%)                   |
| I do not have time to go and get the vaccine                                                | 328 (17.3%)             | 256 (19.1%)              | 286 (20.4%)              | 280 (21.2%)              | 246 (23.2%)                |
| I have already had COVID-19, so I don't need to be vaccinated                               | 1 (0.1%)                | 3 (0.2%)                 | 1 (0.1%)                 | 11 (0.8%)                | 1 (0.1%)                   |
| I have heard there are not enough vaccines (stockouts/ restricted supplies) in the country  | 62 (3.3%)               | 48 (3.6%)                | 48 (3.4%)                | 48 (3.6%)                | 41 (3.9%)                  |
| I went to the vaccination centre but couldn't get the vaccine (not available or long queue) | 125 (6.6%)              | 111 (8.3%)               | 117 (8.4%)               | 118 (8.9%)               | 77 (7.3%)                  |
| I am young and healthy, so I don't need a vaccine                                           | 80 (4.2%)               | 78 (5.8%)                | 96 (6.9%)                | 117 (8.9%)               | 83 (7.8%)                  |
| The vaccine might hurt my fertility                                                         | 201 (10.6%)             | 112 (8.4%)               | 151 (10.8%)              | 126 (9.5%)               | 87 (8.2%)                  |
| I am worried about side effects (other than fertility)                                      | 377 (19.9%)             | 228 (17.0%)              | 265 (18.9%)              | 254 (19.2%)              | 207 (19.5%)                |
| I don't think the vaccine is safe                                                           | 362 (19.1%)             | 223 (16.6%)              | 288 (20.6%)              | 279 (21.1%)              | 206 (19.4%)                |
| I don't believe the vaccine works                                                           | 207 (10.9%)             | 155 (11.6%)              | 176 (12.6%)              | 194 (14.7%)              | 139 (13.1%)                |
| My religion does not allow me to have the COVID-19 vaccine                                  | 75 (4.0%)               | 43 (3.2%)                | 55 (3.9%)                | 44 (3.3%)                | 28 (2.6%)                  |
| Afraid of dying after 2 years                                                               | 300 (15.8%)             | 190 (14.2%)              | 216 (15.4%)              | 196 (14.8%)              | 125 (11.8%)                |

**Supplemental Table 2:** Univariable logistic regression analysis of the association between COVID-19 vaccination and sociodemographic variables

|                         | Overall<br>OR (95%CI) | Harare<br>OR (95%CI) | Bulawayo<br>OR (95%CI) | Mashonaland East<br>OR (95%CI) |
|-------------------------|-----------------------|----------------------|------------------------|--------------------------------|
| Sex                     |                       |                      |                        |                                |
| Female                  | 1 (base)              | 1 (base)             | 1 (base)               | 1 (base)                       |
| Male                    | 1.83 (1.72 – 1.95)    | 1.68 (1.51 – 1.88)   | 1.52 (1.36 – 1.70)     | 2.05 (1.82 – 2.30)             |
| Age                     |                       |                      |                        |                                |
| < 20                    | 1 (base)              | 1 (base)             | 1 (base)               | 1 (base)                       |
| 20-22                   | 1.18 (1.10 – 1.28)    | 1.38 (1.21 – 1.58)   | 1.36 (1.19 – 1.56)     | 1.06 (0.92 – 1.21)             |
| > 22                    | 1.22 (1.14 – 1.31)    | 1.57 (1.39 – 1.78)   | 1.44 (1.26 – 1.63)     | 1.05 (0.93 – 1.20)             |
| Education               |                       |                      |                        |                                |
| Primary                 | 1 (base)              | 1 (base)             | 1 (base)               | 1 (base)                       |
| Form 4                  | 1.78 (1.39 – 2.28)    | 1.79 (1.14 – 2.79)   | 1.89 (1.19 – 3.00)     | 1.44 (0.92 – 2.26)             |
| Form 6                  | 3.80 (2.92 – 4.95)    | 4.54 (2.85 – 7.23)   | 3.74 (2.29 – 6.11)     | 3.17 (1.96 – 5.14)             |
| Tertiary                | 4.71 (3.57 – 6.21)    | 6.15 (3.82 – 9.89)   | 4.94 (2.92 – 8.35)     | 3.98 (2.39 – 6.61)             |
| Socioeconomic status    |                       |                      |                        |                                |
| Poorest                 | 1 (base)              | 1 (base)             | 1 (base)               | 1 (base)                       |
| 2 <sup>nd</sup> poorest | 1.21 (1.10 – 1.32)    | 1.38 (1.16 – 1.64)   | 1.19 (1.02 – 1.39)     | 1.01 (0.86 – 1.19)             |
| 3 <sup>rd</sup> poorest | 1.38 (1.26 – 1.51)    | 1.72 (1.46 – 2.03)   | 1.20 (0.95 – 1.50)     | 1.21 (1.02 – 1.42)             |

|                         |                    |                    |                    |                    |
|-------------------------|--------------------|--------------------|--------------------|--------------------|
| 4 <sup>th</sup> poorest | 1.54 (1.41 – 1.69) | 2.28 (1.94 – 2.69) | 1.36 (1.12 – 1.59) | 1.39 (1.15 – 1.67) |
| Least poor              | 1.98 (1.80 – 2.18) | 2.86 (2.42 – 3.38) | 1.51 (1.27 – 1.80) | 2.02 (1.69 – 2.43) |

Adjusted by month of recruitment, OR=odds ratio, 95%CI=95% confidence interval

**Supplemental Table 3:** Multivariable logistic regression analysis of the association between COVID-19 vaccination and sociodemographic variables in the control clusters of the CHIEDZA trial

|                             | Overall (n=8,788)<br>OR (95% CI) | Harare (n=2,918)<br>OR (95% CI) | Bulawayo (n=2,976)<br>OR (95% CI) | Mashonaland East<br>(n=2,894)<br>OR (95% CI) |
|-----------------------------|----------------------------------|---------------------------------|-----------------------------------|----------------------------------------------|
| Sex                         |                                  |                                 |                                   |                                              |
| Female                      | 1 (p < 0.0001)                   | 1 (p < 0.0001)                  | 1 (p = 0.0051)                    | 1 (p < 0.0001)                               |
| Male                        | 1.66 (1.51 – 1.82)               | 1.59 (1.35 – 1.86)              | 1.26 (1.07 – 1.49)                | 2.16 (1.82 – 2.56)                           |
| Age                         |                                  |                                 |                                   |                                              |
| < 20                        | 1 (p = 0.0027)                   | 1 (p = 0.0026)                  | 1 (p = 0.0029)                    | 1 (p = 0.2994)                               |
| 20-22                       | 1.12 (1.00 – 1.25)               | 1.25 (1.02 – 1.52)              | 1.23 (1.01 – 1.50)                | 0.96 (0.78 – 1.18)                           |
| > 22                        | 1.20 (1.08 – 1.33)               | 1.37 (1.14 – 1.64)              | 1.39 (1.14 – 1.68)                | 1.12 (0.93 – 1.36)                           |
| Education                   |                                  |                                 |                                   |                                              |
| Primary                     | 1 (p < 0.0001)                   | 1 (p < 0.0001)                  | 1 (p < 0.0001)                    | 1 (p < 0.0001)                               |
| Form 4                      | 1.59 (1.41 – 1.79)               | 1.62 (1.31 – 2.01)              | 1.78 (1.44 – 2.20)                | 1.42 (1.16 – 1.74)                           |
| Form 6                      | 3.17 (2.65 – 3.80)               | 3.19 (2.36 – 4.32)              | 3.36 (2.45 – 4.61)                | 3.02 (2.13 – 4.28)                           |
| Secondary and above         | 4.40 (3.52 – 5.49)               | 4.88 (3.44 – 6.92)              | 5.94 (3.74 – 9.43)                | 3.15 (2.12 – 4.69)                           |
| Socioeconomic status        |                                  |                                 |                                   |                                              |
| Poorest 20%                 | 1 (p = 0.0151)                   | 1 (p = 0.0047)                  | 1 (p = 0.5191)                    | 1 (p = 0.0014)                               |
| 2 <sup>nd</sup> poorest 20% | 0.93 (0.81 – 1.07)               | 1.08 (0.84 – 1.40)              | 1.16 (0.88 – 1.53)                | 0.84 (0.67 – 1.06)                           |
| 3 <sup>rd</sup> poorest 20% | 1.05 (0.92 – 1.21)               | 1.24 (0.97 – 1.59)              | 1.22 (0.94 – 1.59)                | 1.09 (0.85 – 1.40)                           |

|                             |                    |                    |                    |                    |
|-----------------------------|--------------------|--------------------|--------------------|--------------------|
| 4 <sup>th</sup> poorest 20% | 1.06 (0.93 – 1.22) | 1.31 (1.02 – 1.67) | 1.21 (0.93 – 1.58) | 1.13 (0.88 – 1.46) |
| Least poor                  | 1.21 (1.04 – 1.40) | 1.60 (1.23 – 2.08) | 1.07 (0.80 – 1.41) | 1.56 (1.19 – 2.05) |

Analysis was adjusted for month of recruitment. OR=odds ratio, 95% CI=95% confidence interval. P-values are the result of a likelihood ratio test

**Supplemental Table 4:** List of assets used in the principal component analysis to derive socioeconomic status

| <b>Assets</b> | <b>Response options</b> |
|---------------|-------------------------|
| Refrigerator  | Yes/No                  |
| Bicycle       | Yes/No                  |
| Car           | Yes/No                  |
| Television    | Yes/No                  |
| Radio         | Yes/No                  |
| Microwave     | Yes/No                  |
| Cell phone    | Yes/No                  |
| Computer      | Yes/No                  |
